# Supplementary material
Source: Springer Nature journal article supplement (https://www.springermedizin.de/resource/supplementary/12891_2013_2435_MOESM2_ESM.pdf/9509372)

Multidisciplinary  
clinic

Therapeutic strategy

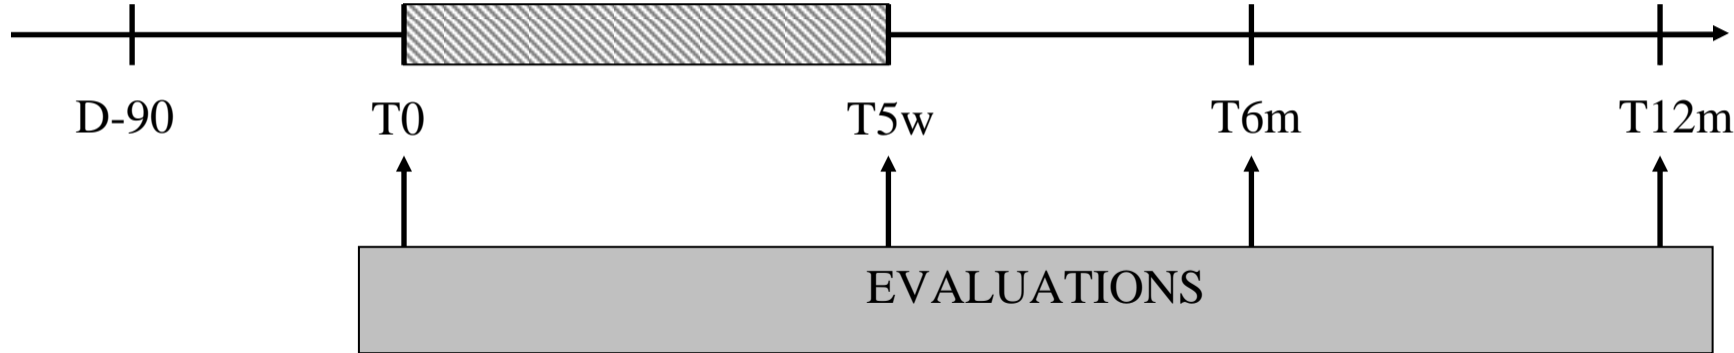

D-90

T0

T5w

T6m

T12m

EVALUATIONS

Supplement: MOESM2 [file 9509372]
